# 1 Single-cell ATAC-seq clustering and differential 2 analysis by convolution-based approach

3 **Li Lin<sup>1\*</sup>, Liye Zhang<sup>1\*</sup>**

4 <sup>1</sup>School of Life Science and Technology, ShanghaiTech University, Shanghai, China.

5 \*Correspondence should be addressed to L.L. ([linli@shanghaitech.edu.cn](mailto:linli@shanghaitech.edu.cn)) or L.Z.

6 ([zhangly@shanghaitech.edu.cn](mailto:zhangly@shanghaitech.edu.cn)).

7

## 8 **Abstract**

9 Single-cell ATAC-seq is a powerful tool to interrogate the epigenetic heterogeneity of cells. Here,  
10 we present a novel method to calculate the pairwise similarities between single cells by directly  
11 comparing their Tn5 insertion profiles instead of the binary accessibility matrix using a  
12 convolution-based approach. We demonstrate that our method retains the biological  
13 heterogeneity of single cells and is less affected by undesirable batch effects, which leads to more  
14 accurate results on downstream analyses such as dimension reduction and clustering. Based on  
15 the similarity matrix learned from epiConv, we develop an algorithm to infer differentially  
16 accessible peaks directly from heterogeneous cell population to overcome the limitations of  
17 conventional differential analysis through two-group comparisons.

18

## 19 Introduction

20 The expression of genes is regulated by a series of transcription factors (TFs) that bind to the  
21 regulatory elements of the genome. As the accessible chromatin covers more than 90% TF  
22 binding regions, many techniques, such as Assay for Transposase-Accessible Chromatin using  
23 sequencing (ATAC-seq), have been developed to detect the accessible states of chromatin<sup>1, 2</sup>.  
24 Recent technical advancements in ATAC-seq have made it possible to profile the chromatin states  
25 of single cells at a high-throughput manner<sup>3-5</sup>. However, both data processing and interpretation  
26 of single-cell ATAC-seq (scATAC-seq) data is more challenging than single-cell RNA-seq (scRNA-  
27 seq) data owing to low DNA copy number and complexity of chromatin states<sup>1</sup>.

28 Up to now, most methods cluster single cells based on a peak by cell matrix (e.g. Buenrostro  
29 et al. 2015<sup>6</sup>). Unlike well-annotated RNA transcripts in the genome, the exact locus of regulatory  
30 elements is largely uncharacterized and must be learned from the data itself. However, learning  
31 cell type specific regulatory elements from cell mixtures is problematic. Given that there are no  
32 golden rules to define functional elements across the genome, the strategies to perform such  
33 task varied considerably in different studies<sup>6, 7</sup>, and its effect on downstream analyses is largely  
34 unknown.

35 Detecting differentially expressed genes (or differentially accessible peaks for ATAC-seq, we  
36 call them DE peaks below) is another important task in single cell analysis. In a conventional  
37 pipeline, cells are first grouped into several clusters and subsequent differential analysis is  
38 performed by comparison between clusters. Thus, the resolution settings (e.g. number of  
39 clusters) may have strong effects on the identification of genes or locus accounting for the  
40 heterogeneity of cell population. Recently one method incorporated pseudotime as one predictor  
41 into the regression model to infer DE peaks, instead of performing two-group comparisons<sup>8</sup>. But  
42 it required cells to be properly embedded into one dimensional space (e.g. pseudotime through  
43 differentiation process), which greatly limits its application in complex cell population. Moreover,  
44 cells still need to be clustered into small groups (50~100 cells). Such processing step overcomes  
45 the sparsity of scATAC-seq data but reduces the sample size. In scRNA-seq, an alternative  
46 approach is to find highly variable genes instead of differentially expressed genes, which does not  
47 require the clustering of cell population to be defined. But this strategy cannot be applied to

48 scATAC-seq as the chromatin state is always binarized. Despite that, several state-of-the-art tools  
49 designed for scATAC-seq merge individual peaks into meta features (regulomes, topics, principal  
50 components, k-mers, etc.) to overcome the sparsity of data<sup>3, 9, 10</sup>. Subsequent differential analysis  
51 is performed on meta features instead of individual peaks. Such strategy may help reveal the  
52 epigenetic programs that governs the cell identities but lacks sufficient resolution for the  
53 dynamic change of individual peaks.

54 Here, we introduce a novel tool, named epiConv, for scATAC-seq analysis. EpiConv addresses  
55 two important questions in scATAC-seq analysis, cell clustering and differential analysis. Unlike  
56 most of existing methods, epiConv learns the similarities (or distances) between single cells from  
57 their raw Tn5 insertion profiles by a convolution-based approach, instead of a binary accessibility  
58 matrix. We demonstrate that epiConv retains biological heterogeneity of single cells and is less  
59 sensitive to unwanted variations derived from multiple batches or sample preparing protocols.  
60 Utilizing the similarities learned by epiConv, we also develop an algorithm to infer DE peaks  
61 among single cells that can be directly applied to cell mixtures without resolving the intra  
62 population structure.

63

## 64 Results

### 65 Infer the similarity from Tn5 insertion profiles

66 First, we give an overview of the algorithm that calculates the similarity between cells from  
67 their Tn5 insertion profiles (**Fig. 1**). Given two cells, A with  $m$  insertions and B with  $n$  insertions in  
68 one genomic region, we collapse the insertions into a continuous distribution across the genome  
69 by Gaussian smoothing as follows:

$$70 \quad f_{Ai}(x) = \frac{1}{\sqrt{2\pi}\sigma} \exp\left(-\frac{(x-\mu_{Ai})^2}{2\sigma^2}\right), \quad f_A(x) = \sum_i^m f_{Ai}(x)$$

$$71 \quad f_{Bj}(x) = \frac{1}{\sqrt{2\pi}\sigma} \exp\left(-\frac{(x-\mu_{Bj})^2}{2\sigma^2}\right), \quad f_B(x) = \sum_j^n f_{Bj}(x)$$

72 Where  $\mu_{Ai}$  is the locus of insertion  $i$  in cell A,  $\mu_{Bj}$  is the locus of insertion  $j$  in cell B,  $f_A(x)$   
73 and  $f_B(x)$  give the overall chromatin states of cell A and cell B in the given region. The similarity  
74 between A and B over the given region ( $S_{AB}$ ) is calculated by the convolution of  $f_A(x)$  and  $f_B(x)$   
75 and can be solved analytically as follows:

76 
$$s_{AB} = \int f_A(x)f_B(x)dx = C \cdot \sum_{i,j} \exp\left(-\frac{(\mu_{Ai} - \mu_{Bj})^2}{4\sigma^2}\right)$$

77 Where C is an  $\sigma$  dependent constant. In this study, parameter  $\sigma$  is set to 100 bp. To save running  
78 time, long distance ( $> 4\sigma$ ) is treated as infinity. Through weighted aggregation of the similarities  
79 from all informative regions across the genome and proper normalization with respect to  
80 sequencing depth, we can obtain the normalized similarity score between any two cells.  
81 Subsequent analyses such as dimension reduction or clustering can be performed on the  
82 similarity matrix. We also develop a simplified version of epiConv (epiConv-simp), which can be  
83 applied to binary accessibility matrix like existing methods. The simplified version does not  
84 perform as well as the full version but always generates similar results and runs much faster. In  
85 the benchmarking below, we show the results from both full and simplified versions. Other  
86 details of epiConv are provided in Methods section.

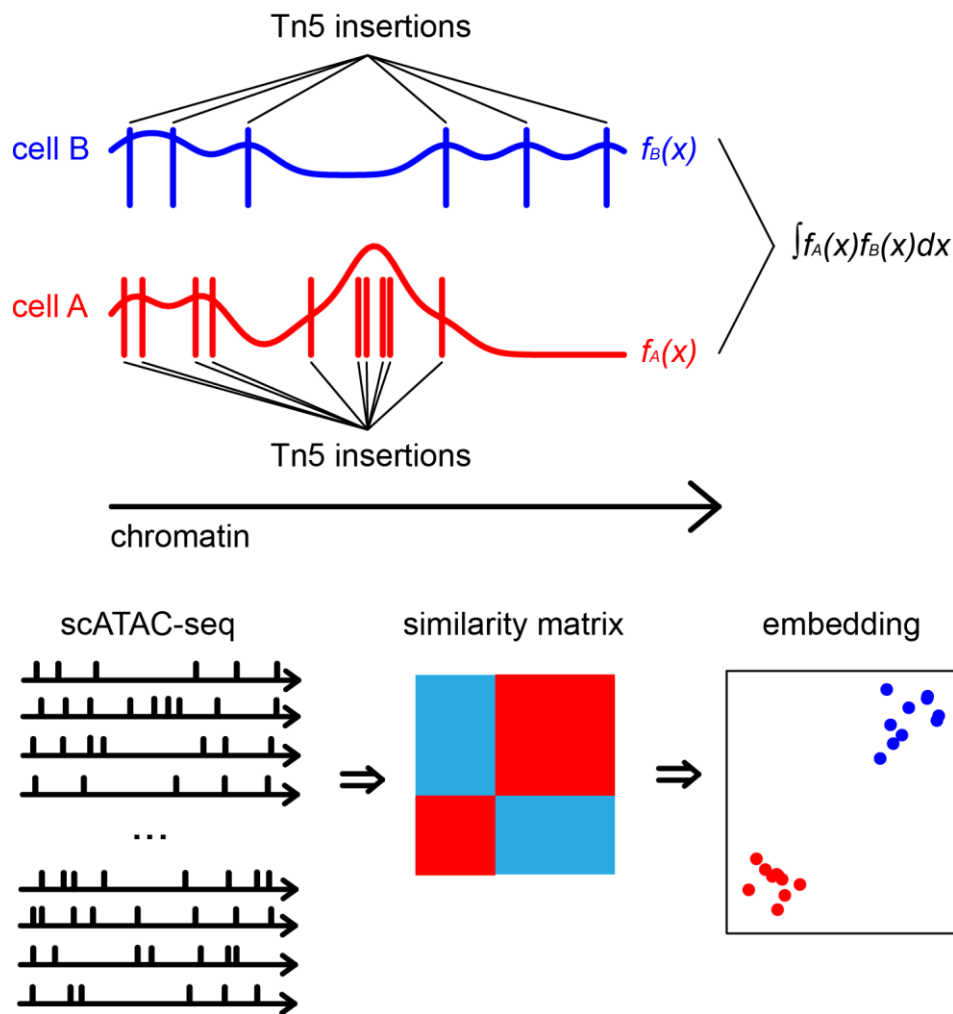

87

88 **Figure 1.** An overview of the epiConv algorithm.

89

## 90 **EpiConv outperforms other methods in cell lines data**

91 We evaluated the performance of epiConv on several datasets and compared it with  
92 cisTopic<sup>10</sup>, one state-of-the-art method showing better performance than most existing clustering  
93 methods and Latent Semantic Indexing (LSI)<sup>3</sup>, which had been widely used in many studies. We  
94 first applied epiConv to the data from Buenrostro et al. 2015<sup>6</sup>. Specifically, we mixed the data of  
95 four cell lines from hematopoietic lineages (K562, GM12878, HL-60 and TF-1) together and tested  
96 whether epiConv could cluster single cells correctly based on their biological identities. Given the  
97 apparent difference among cell lines, each method performed well in clustering single cells from  
98 the same cell line together (**Fig. 2**). However, we found that LSI could not clearly segregate drug-  
99 treated and untreated K562 cells. CisTopic segregated treated and untreated K562 cells into two  
100 clusters but cells treated by different drugs were still mixed together. Both epiConv-full and  
101 epiConv-simp grouped K562 cells treated by different drugs into distinct clusters, yielding the  
102 best results. Notably, untreated K562 cells from four replicates were grouped into one cluster  
103 without obvious batch effects. Thus, the segregation of cells treated by different drugs were  
104 more likely to be attributed to their biological variations rather than batch effects. The simplified  
105 version of epiConv performed slightly worse than the full version for K562 cells but was still  
106 capable of segregating cells according to their treatment (**Fig. 2b**).

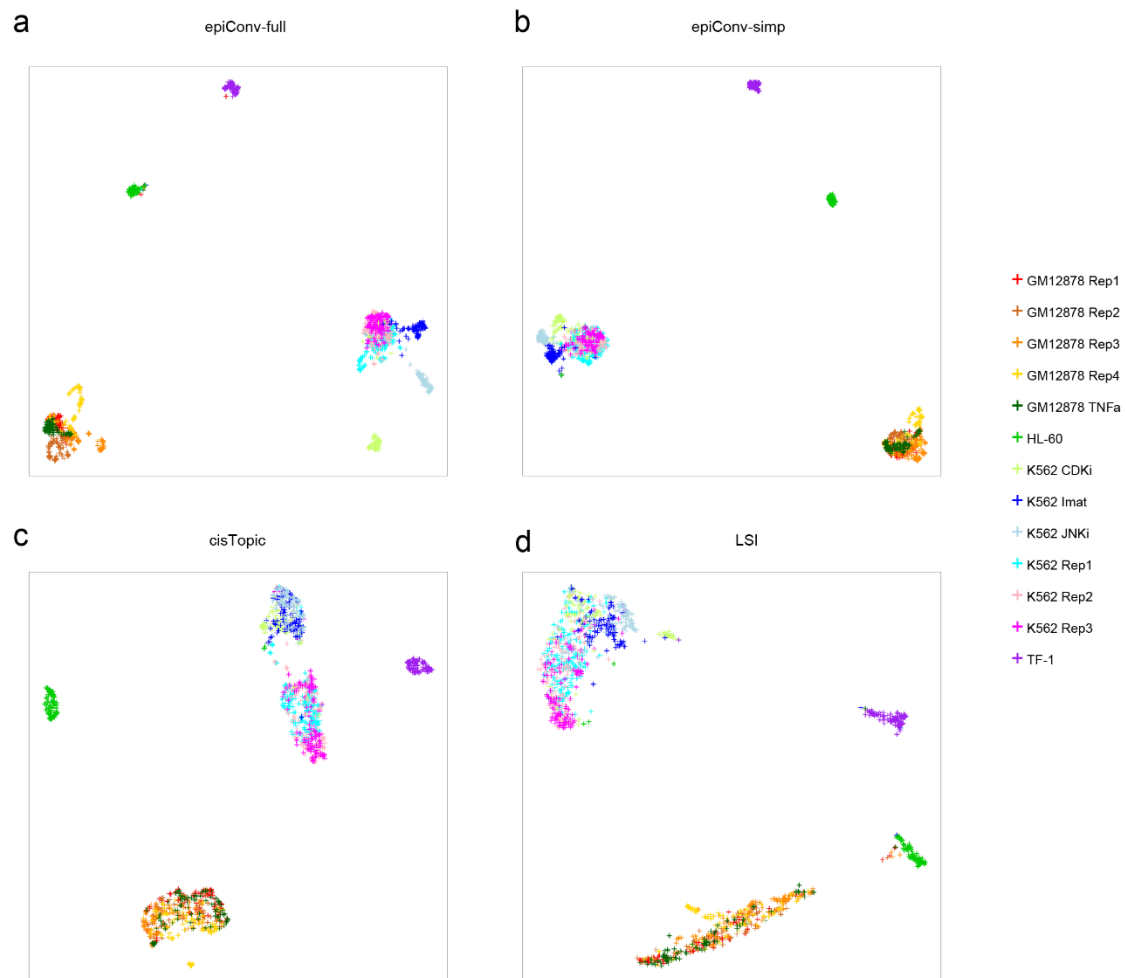

107

108 **Figure 2.** EpiConv performs better than other methods on cell lines data. (a) Embedding by  
109 epiConv full version. (b) Embedding by epiConv simplified version. (c) Embedding by cisTopic. (d)  
110 Embedding by LSI.

111

### 112 **EpiConv is less sensitive to batch effects**

113 Next, we applied epiConv to the data generated by droplet-based protocol from Satpathy et  
114 al. 2019<sup>4</sup>. The authors reported detectable batch effects from LSI method that confounded  
115 downstream analyses. Here we asked whether epiConv could perform better. We tested the  
116 performance of epiConv on two datasets, one dataset containing cells from two batches of  
117 unsorted peripheral blood mononuclear cells (PBMCs), two batches of sorted CD4+CD45RA+  
118 naïve CD4 T cells and two batches of sorted CD4+CD45RA- memory CD4 T cells (PBMC dataset),  
119 and the other dataset containing two batches of sorted CD34+ hematopoietic progenitors (CD34+  
120 dataset).

121 In PBMC dataset, the majority of cells from two replicates of memory CD4 T cells were

122 clustered into one tightly related group by epiConv and were close to a small fraction of unsorted  
123 PBMCs. Two replicates of naive CD4 T cells also showed similar results. Other unsorted PBMCs  
124 formed several groups without strong batch effects (**Fig. 3a**). On the contrary, cells were mostly  
125 clustered by batches for both cisTopic and LSI (**Fig. 3b,c**). These results showed that epiConv was  
126 less sensitive to the technical variations between multiple replicates even without dedicated  
127 steps to remove batch effects. To verify whether epiConv clustered single cells based on their  
128 biological identities, we marked single cells according to their annotations from Satpathy et al.  
129 2019<sup>4</sup>. The results of epiConv were also largely consistent with the annotations and revealed all  
130 major lineages of PBMCs (T cells, NK cells, B cells and Monocytes) and several subpopulation of T  
131 cells (**Fig. S1a-c**). In CD34+ dataset, epiConv was still less sensitive to batch effects compared to  
132 cisTopic and LSI (**Fig. 3d-f**). We only found obvious batch effect for the HSC-MPP-LMPP cluster but  
133 cells from two replicates were still closer to each other than to other cell types (**Fig. 3d**). Based on  
134 the annotations from Satpathy et al. 2019<sup>4</sup>, the results of epiConv were also consistent with our  
135 knowledge on hematopoietic differentiation (**Fig. S1d-f**). However, unlike most methods, epiConv  
136 grouped multipotent progenitors (HSC, MPP and LMPP) and other lineage restricted progenitors  
137 into several distinct clusters instead of a continuous differentiation trajectory, highlighting the  
138 difference of chromatin states between multipotent progenitors and lineage restricted  
139 progenitors.

140 To demonstrate that the power of epiConv was not restricted to specific cell lineages or  
141 sample-preparing protocols, we combined scATAC-seq data of adult mouse brain from three  
142 experimental protocols, mouse cortex from 10x Genomics, whole mouse brain from droplet  
143 single-cell assay for transposase-accessible chromatin using sequencing (dscATAC-seq)<sup>5</sup> and sci-  
144 protocols for chromatin accessibility (sci-ATAC-seq)<sup>7</sup>. The dataset contained single cells from 5  
145 batches, one from 10x Genomics, two from dscATAC-seq and two from sci-ATAC-seq. Consistent  
146 with previous results, epiConv performed better than cisTopic and LSI in removing batch effects  
147 (**Fig. 3g-i**) and agreed with the annotations from Cusanovich et al. 2018<sup>7</sup> and Lareau et al. 2019<sup>5</sup>  
148 by clustering cells with the same identity together (**Fig. S1g,j**). CisTopic also largely agreed with  
149 the annotations from original articles (**Fig. S1h,k**) while LSI did not agreed with the annotations  
150 on excitatory neuron cells (**Fig. S1i,l**). As described from Lareau et al. 2019, the annotations were  
151 based on k-mer deviation scores (7-mers) using the chromVAR algorithm but the embedding of

152 LSI was also consistent with the annotations<sup>9</sup>. Thus, LSI might require a larger sample size to  
153 resolve the relationships between highly similar cells. Although we lacked direct evidence to  
154 evaluate which method performed best in clustering cells according to their cell identities, the  
155 results of epiConv could always be supported by the annotations from original article. Besides  
156 that, only epiConv was capable of clustering cells in a batch-independent manner.

157 Finally, we compared the results between full and simplified versions of epiConv. The results  
158 of simplified version were highly consistent with full version and were also less sensitive to batch  
159 effects on the three datasets described above (**Fig. S2**). However, for CD34+ cells, epiConv-simp  
160 failed to reveal the intra-structure of CLP, Pro-B and Pre-B cluster (compare Fig. S2d with Fig.  
161 S1d). In conclusion, the performances of full version and simplified version are similar but  
162 sometimes the resolution of simplified version might be slightly lower.

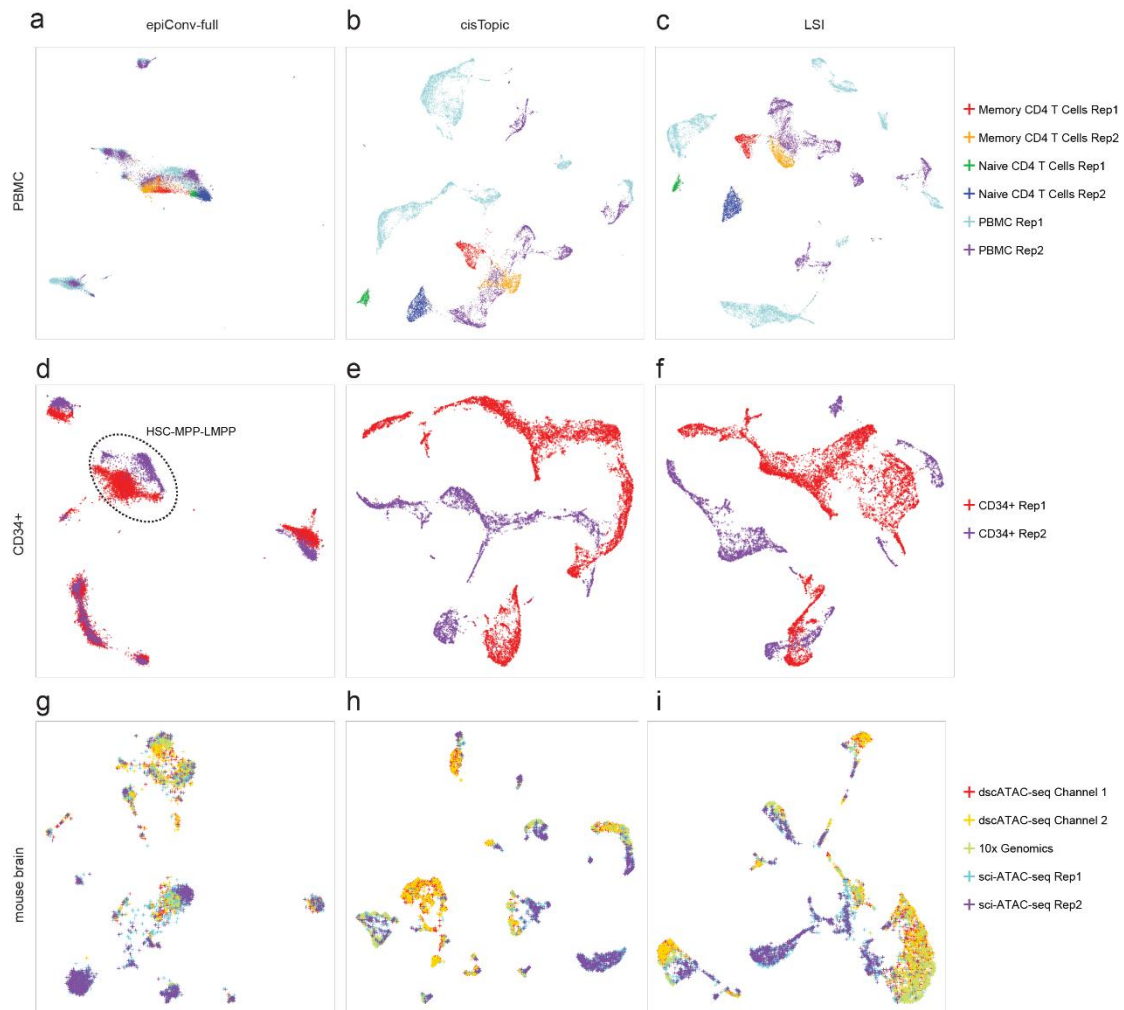

163  
164 **Figure 3.** EpiConv is less sensitive to batch effects. (a-c) Embedding by epiConv full version,  
165 cisTopic and LSI for PBMC dataset. (d-f) Embedding by epiConv full version, cisTopic and LSI for



166 CD34+ dataset. The HSC-MPP-LMPP cluster in **(d)** is circled. **(g-i)** Embedding by epiConv full  
167 version, cisTopic and LSI for the integration of mouse brain data from dscATAC-seq, 10x Genomics  
168 and sci-ATAC-seq.

169

## 170 **EpiConv is scalable with large datasets**

171 As the full version of epiConv do pairwise comparisons between single cells, the step of  
172 insertions counting is slower than other methods but can be split into small jobs and run in  
173 parallel. Based on our tests, it requires 75 CPU hours for 50 million fragments from 5,000 cells  
174 (after removing low quality cells and fragments outside informative regions) and 2,400 CPU hours  
175 for 270 million fragments from 20,000 cells. The simplified version runs much faster and can be  
176 applied to large datasets. Based on our tests, the simplified version requires 17 hours and 520 GB  
177 RAM for the Mouse Cell Atlas dataset<sup>7</sup> (81,173 cells and 436,206 peaks) with single thread, faster  
178 than cisTopic (48 hours) but slower than LSI (1 hour). The results of Mouse Cell Atlas dataset by  
179 epiConv-simp also largely agreed with the annotations from Cusanovich et al. 2018<sup>7</sup> (**Fig. S3**).

180 Notably, a large proportion of cells were marked as unknown in the Mouse Cell Atlas dataset  
181 (**Fig. 4a-c**). In the results of cisTopic and LSI, these cells formed a large cluster of their own,  
182 showed close relationships with several clusters with known identities but did not overlap with  
183 them (**Fig. 4a-b**). However, unknown cells did not form a single cluster but were mixed with other  
184 known cell types in the results of epiConv-simp (mainly associated with 7 clusters with more than  
185 10% cells marked as unknown, **Fig. 4c**). This might suggest a large improvement of epiConv over  
186 cisTopic and LSI. In order to validate our findings, we aggregated the cells with known and  
187 unknown cell identities respectively for each cluster. Then we calculated the spearman  
188 correlation between the 14 aggregated samples over a set of highly accessible peaks (accessible  
189 in at least 1% cells from these 7 clusters). We found that 6 out of 7 unknown samples showed  
190 highest correlations with corresponding known samples within the same clusters (**Fig. 4d**),  
191 suggesting that epiConv assigned “unknown” cells to correct clusters. The only exception was the  
192 cluster that contained collecting duct, distal convoluted tubule and loop of henle. Unknown cells  
193 from this cluster did not show higher correlation (> 0.6) with any other samples. We thought that  
194 this might be due to the high level of heterogeneity between tubule cells. By these results, we  
195 confirmed that epiConv showed significant improvements over current methods on the Mouse

196 Cell Atlas dataset.

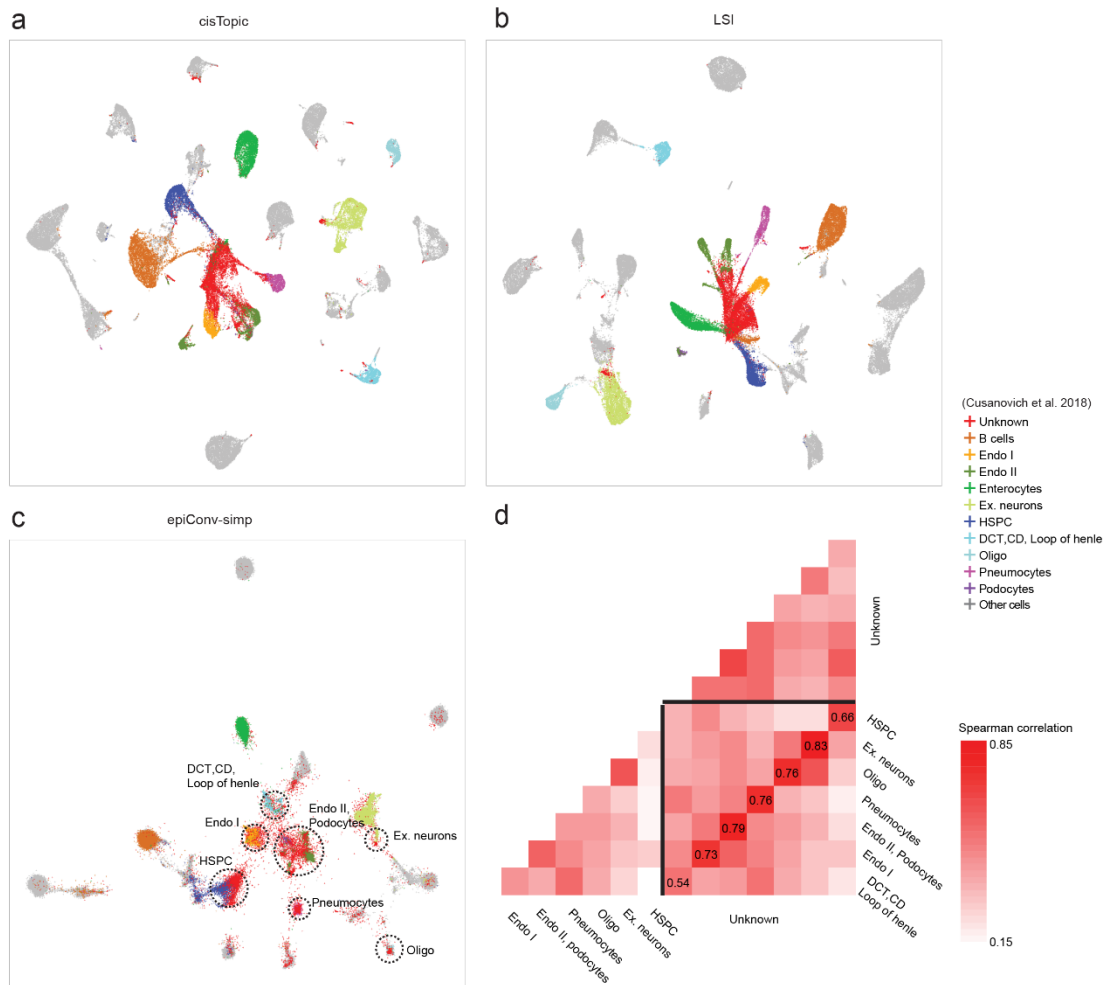

197

198 **Figure 4.** EpiConv reveals the identities of unknown cells in Mouse Cell Atlas dataset. (a)  
 199 Embedding by cisTopic. (b) Embedding by LSI. (c) Embedding by epiConv-simp. In (a-c), unknown  
 200 cells and cells showing close relationships with them are colored according to the annotations  
 201 from Cusanovich et al. 2018. Other irrelevant cells are colored in grey. Seven major clusters in (c)  
 202 that contain high proportion of unknown cells are circled. (d) Spearman correlations between  
 203 aggregated samples with known and unknown identities from 7 major clusters marked in (c).  
 204 Unknown samples are sorted in the same order as corresponding known samples belonging to  
 205 the same cluster. Numbers in the diagonal elements show the correlations between unknown  
 206 samples and corresponding known samples. Endo I, endothelial I cells; Endo II, endothelial II  
 207 cells; Ex. neurons, excitatory neurons; HSPC, hematopoietic progenitors; DCT, distal convoluted  
 208 tubule; CD, collecting duct; Oligo, oligodendrocytes.

209

## 210 **EpiConv detects differentially accessible peaks in cell mixtures**

211 In the section below, we aim to develop an algorithm to infer DE peaks directly from cell  
212 mixtures. Our algorithm compares the number of accessible cells among each cell's neighbors  
213 with the frequency of accessible cells in cell mixture for each peak and turns the binary  
214 chromatin states into normalized z-scores, which show the enrichment of accessible cells among  
215 neighbors (we call it z-score below). If the number of cells showing high z-scores for one peak  
216 exceeds the threshold, we then consider the peak to be differentially accessible. Notably, the way  
217 of normalization may strongly affect the results of differential analysis. Although most studies  
218 adopt library size normalization (scaling the library size of single cells to be the same), few studies  
219 may use other strategies (e.g. scale the number of Tn5 insertions falling in promoters to be the  
220 same<sup>5</sup>). In this study, we do not want to address this question but modify our algorithm to be  
221 compatible with user-specified scaling factors in normalization. In this study, we try two  
222 normalization strategies: 1) set the scaling factors of all cells to be 1 (cell-norm); 2) set the scaling  
223 factors equal to the total number of insertions falling into peaks (lib-norm). In cell-norm strategy,  
224 the number of neighbors for each cell remains constant while the total library size of neighbors  
225 may vary. This strategy reflects the change of raw binary accessibility. In lib-norm strategy, the  
226 total library size of neighbors for each cell remains constant while the number of neighbors may  
227 vary. This strategy reflects the change of relative abundance of accessibility and can be  
228 considered as conventional library size normalization. When the library sizes do not vary between  
229 neighbors and non-neighbors for most cells, two strategies should give similar results.

230 In order to test whether the algorithm could detect DE peaks in cell mixture, we first applied  
231 our method to one dataset of myoblast differentiation<sup>8</sup>. We found that although epiConv could  
232 reconstruct the differentiation process of myoblasts, where cells were roughly ordered by  
233 harvesting times (**Fig. 5a**; the results were similar for cisTopic, LSI and epiConv-simp, see **Fig. S4a-**  
234 **c**), it was difficult to cluster cells. Using our algorithm, we detected 7,219 peaks to be  
235 differentially accessible (cell-norm strategy) during the differentiation process. To show the  
236 regulation pattern of DE peaks, we plotted heatmap of z-scores, where cells and DE peaks were  
237 embedded into one-dimensional (1D) space based on the similarity matrix and the spearman  
238 correlation of z-scores between peaks (**Fig. 5b**). The results showed approximately half peaks to  
239 be more accessible in the early stage of differentiation and others to be more accessible in the

240 later stage. The dynamic changes of z-scores along differentiation was consistent with merged  
 241 scATAC-seq profiles by harvesting times, demonstrating the reliability of our algorithm (**Fig. 5c**).  
 242 The results from cell-norm and lib-norm strategies showed some difference for the intermediate  
 243 cell types as these cells had lower library sizes but they still agreed with each other on the global  
 244 regulation patterns of peaks (up- or down-regulated through differentiation, **Fig. S4d,e**). As  
 245 mentioned above, the binary accessibility profiles agreed better with the z-scores from cell-norm  
 246 strategy (**Fig. S4f**).

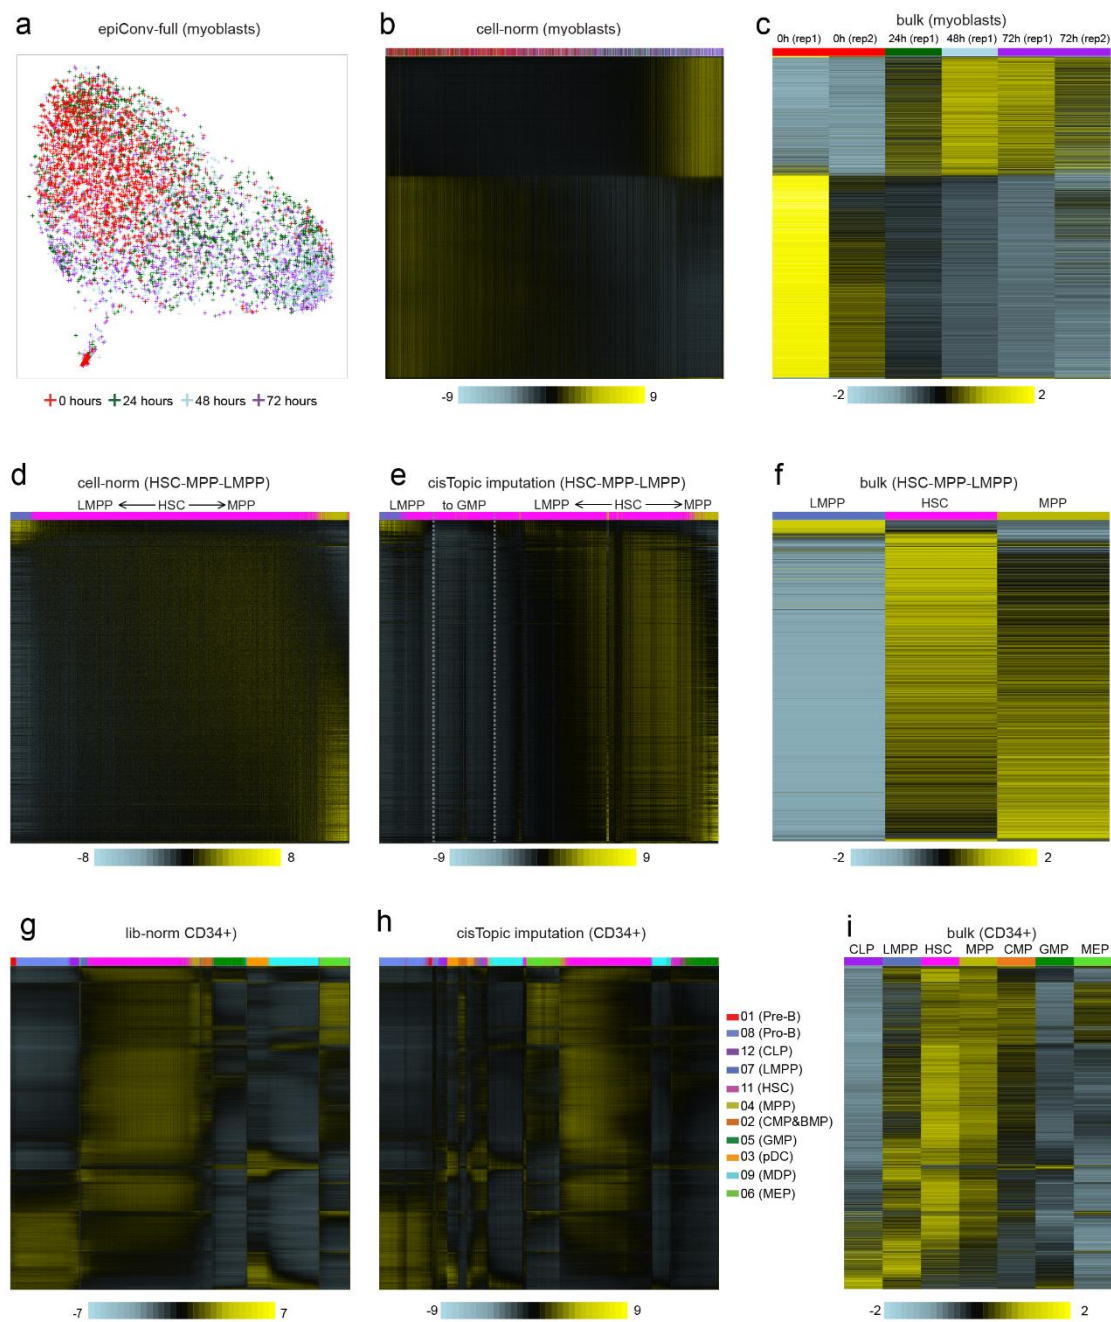

247

248 **Figure 5.** EpiConv detects differentially accessible peaks in cell mixtures. **(a)** Embedding of

249 myoblast single cells by epiConv-full. **(b)** Accessibility z-scores of myoblast single cells inferred by  
250 epiConv. **(c)** Accessibility profiles of aggregated myoblast bulk samples by harvesting times. Cells  
251 or aggregated samples in **(b,c)** are colored by harvesting times according to **(a)**. **(d)** Accessibility z-  
252 scores of HSC-MPP-LMPP single cells inferred by epiConv. **(e)** Accessibility Imputations of HSC-  
253 MPP-LMPP single cells inferred by cisTopic. **(f)** Accessibility profiles of HSC, MPP and LMPP bulk  
254 samples. **(g)** Accessibility z-scores of CD34+ single cells inferred by epiConv. **(h)** Accessibility  
255 Imputations of CD34+ single cells inferred by cisTopic. **(i)** Accessibility profiles of CD34+ bulk  
256 samples. Peaks (y-axis) in **(b,c)**, **(d-f)** and **(g-i)** are ordered according to 1D embedding by z-scores,  
257 respectively. Cells (x-axis) in **(d,g)** are ordered according to 1D embedding by epiConv and cells in  
258 **(e,h)** are ordered according to 1D embedding by cisTopic. HSC, hematopoietic stem cells; MPP,  
259 multipotent progenitors; LMPP, lymphoid-primed multipotent progenitors; CMP, common  
260 myeloid progenitors; BMP, basophil-mast cell progenitors; GMP, granulocyte-macrophage  
261 progenitors; MDP, monocyte-dendritic cell progenitors; pDC, plasmacytoid dendritic cells; MEP,  
262 megakaryocyte-erythroid progenitors; CLP, common lymphoid progenitors.

263

264 Next, we want to test the sensitivity of our algorithm. We first clustered cells by density  
265 cluster algorithm<sup>11</sup> and then applied our algorithm to the HSC-MPP-LMPP cluster in the CD34+  
266 dataset described above (**Fig. S5a**). In order to prevent detecting differentially accessible peaks  
267 between replicates, we did not perform cross-batch analysis and applied our algorithm to cells in  
268 replicate 1. To our knowledge, few tools could detect DE peaks without known cell identities or  
269 differentiation trajectory but some methods were capable of revealing the dynamics of  
270 accessibility in single-cell resolution by imputation approach (e.g. cisTopic). So, we also included  
271 the imputations of cisTopic in our benchmarking (the cells from HSC-MPP-LMPP cluster also  
272 formed a cluster in the results of cisTopic, see **Fig. S5b**). Through our algorithm, we detected  
273 1,513 DE peaks (cell-norm strategy) within the HSC-MPP-LMPP cluster and compared the z-scores  
274 of them with the imputations of cisTopic and bulk ATAC-seq profiles (**Fig. 5d-f**). The dynamic  
275 changes of z-scores were highly consistent with the bulk ATAC-seq profiles of FACS-sorted HSCs,  
276 MPPs and LMPPs<sup>12</sup>. As there were no obvious local enrichment of cells with high or low library  
277 size in the HSC-MPP-LMPP cluster (**Fig. S5c**), the results from two strategies and binary  
278 accessibility profiles did not show conflicts with each other (**Fig. S5d-f**). All DE peaks were

279 properly ordered through the 1D embedding and agreed with their accessibility dynamics in both  
280 single-cell and bulk samples, suggesting that the co-accessible pattern between peaks could be  
281 revealed by z-scores. (**Fig. 5d-f**). Moreover, our results also showed gradual gain or loss of  
282 accessibility in a wide range of peaks through the continuous transition of cell states. Notably, the  
283 dynamic changes of accessibility did not completely match the clustering. These results  
284 demonstrated that inferring DE peaks directly from cell mixtures helped reveal proper clusters  
285 and intermediate cell states in a signature-driven manner instead of statistical ways. The  
286 imputation from cisTopic did not show strong confliction with bulk profiles but the pattern of  
287 gradual gain or loss of accessibility through x-axis (cells) and y-axis (peaks) was not obvious (**Fig.**  
288 **5e**). Some cells were highly accessible in LMPP unique peaks but also moderately accessible in  
289 HSC or MPP unique peaks, which did not agree with the bulk profiles. Moreover, the chromatin  
290 states of some cells were inaccessible for almost all peaks. We found that these cells might be  
291 intermediate cell types under the differentiation to GMP, as suggested by cisTopic (**Fig. S5b**).  
292 Thus, we concluded that cisTopic lacked sufficient resolution for the dynamic changes of  
293 individual peaks and some conflictions between cisTopic and our algorithm could be inherited  
294 from the results of clustering.

295 We also applied our algorithm to all cells in replicate 1 from CD34+ dataset to test the  
296 scalability of our algorithm. Z-scores from lib-norm strategy agreed with cisTopic imputations and  
297 bulk samples (11,126 DE peaks, **Fig. 5g-i**). Similar with previous results on HSC-MPP-LMPP cluster,  
298 we also found a series of peaks that gradually gained or lost accessibility through differentiation  
299 (e.g. MDPs to cDCs, **Fig. 5g**). The z-scores did not fully capture the chromatin states of bulk  
300 samples for a few peaks (**Fig. 5i**). We found that it was derived from the difference between  
301 single-cell and bulk samples (data not shown), probably because there might be some batch  
302 effects between them. CisTopic showed similar imputations but was less likely to arrange cells  
303 with similar accessibility profiles together when embedding cells to 1D space (**Fig. 5h**).  
304 Interestingly, if cells were ordered according to the 1D embedding of epiConv, the cisTopic  
305 imputations of single cells were better revealed and almost identical to the results of z-scores  
306 (**Fig. S5g**). We suspected that the distance matrix inferred by cisTopic might be noisier than  
307 epiConv, which makes cisTopic perform worse than epiConv when embedding cells to 1D space.  
308 As the library size of single cells varied considerably between clusters (HSC-MPP-LMPP cluster

309 had a smaller library size, see **Fig. S5c**), cell-norm strategy selected another group of DE peaks  
310 (2,358 DE peaks, **Fig. S5h,i**). And as expected, the z-scores from these peaks agreed with binary  
311 accessibility profiles. These results demonstrated that different normalization strategies had  
312 strong effects on differential analysis when the library size of single cells varied considerably  
313 between major clusters. In fact, it was not difficult to find DE peaks between clearly segregated  
314 clusters and there were many existing methods that could perform such task. But we  
315 demonstrated that our algorithm was flexible enough to detect DE peaks at different scales and  
316 compatible with various normalization strategies.

317

## 318 **Discussions**

319 In this study, we developed a novel clustering algorithm for scATAC-seq data and compared  
320 it with two other methods, cisTopic and LSI. The most significant difference between our  
321 algorithm and others is that we calculated the distance between single cells using a convolution-  
322 based approach instead of commonly used Euclidean-distance. The Euclidean-distance must be  
323 calculated from a matrix and easily suffers from data sparsity, which is the most remarkable  
324 feature of scATAC-seq data. However, as researchers have already gained a lot of experience on  
325 Euclidean-distance based algorithms through analyzing scRNA-seq data, most methods put their  
326 efforts on merging individual peaks into meta features to make Euclidean-distance applicable.  
327 Here, we demonstrated several advantages of convolution-based approach (performing better in  
328 integrated data from multiple sources and showing higher accuracy in some datasets). However,  
329 Euclidean-distance based approaches still have their advantages (e.g. much faster running speed  
330 with reasonable accuracy). Importantly, each method benchmarked in this study showed some  
331 unique patterns that other methods did not capture (see **Fig. 4** and **Fig. S1**). Given that it is  
332 difficult to benchmark the accuracy of different methods in most datasets, we think that it would  
333 be better to compare results from multiple methods rather than relying on single method and  
334 our method proves to be one of the best candidates for scATAC-seq analyses.

335

## 336 Methods

337 **Informative region calling for epiConv.** EpiConv takes processed fragments as input file. To call  
338 informative regions for epiConv, we first extended Tn5 insertions from both directions using the  
339 pileup command in MACS2<sup>13</sup> (-B --extsize 100). Then, we sorted all sites of the genome by their  
340 density in decreasing order and selected regions with cumulative density less than 70% of total  
341 insertions. These regions were extended from both directions by 100 bp and merged together if  
342 having any overlap. Tn5 insertions overlapping with these informative regions (~70% of total  
343 reads) were used for downstream analysis. We used such strategy instead of MACS2 because the  
344 proportion of reads used in downstream analyses could be easily specified through the threshold  
345 of cumulative density. Moreover, this strategy can always obtain some peaks, while MACS2 may  
346 fail when the number of cells is low (e.g. < 200, reported by Satpathy et al. 2019<sup>4</sup>). The threshold  
347 of cumulative density is determined by the distribution of insertion length. Based on our  
348 preliminary analysis, fragments spanning one or more nucleosomes are noisier than fragments  
349 from nucleosome-free regions. Thus, the threshold should be close to the proportion of  
350 fragments from nucleosome-free regions. For the myoblast and mouse brain datasets, we set the  
351 threshold to 50% as they had higher proportion of fragments spanning one or more nucleosomes  
352 (data not shown).

353 **epiConv algorithm.** In the results section, we described the algorithm to calculate the similarity  
354 between two cells over one region. Here assume that we have N cells and K regions, with the  
355 similarities between any two cells *i* and *j* over region *k* ( $s_{ijk}$ ) being known. First, we weight each  
356 region as follows:

$$357 \quad freq_k = \sqrt{\frac{2}{N(N-1)} \sum_{ij} s_{ijk}}$$
$$358 \quad w_k = \log_{10}(1 + freq_k^{-1})$$

359 The form of weight is similar to that used in LSI but the frequency is replaced by a pseudo-  
360 frequency estimated from our convolution-based approach. We use such form of weight to  
361 increase the contribution of low-density regions to the similarity score. The similarity between  
362 cell *i* and *j* is calculated using a bootstrap approach. Assuming we perform L replicates (L = 30 in  
363 this study) and in each replicate we randomly sample some regions (12.5% of total informative



364 regions in this study). The similarity of  $s_{ij}$  is calculated as follows:

$$365 \quad s_{ij} = \frac{\sum_l \log_{10}(\sum_{k \in \text{rep}_l} s_{ijk} \cdot w_k^2)}{L} - \log_{10}(\text{lib}_i \cdot \text{lib}_j)$$

366 where  $\text{lib}_i$  and  $\text{lib}_j$  is the library size of cell  $i$  and  $j$ . We normalize the aggregated similarity by  $\text{lib}_i \cdot$   
367  $\text{lib}_j$  because  $\sum_{k \in \text{rep}_l} s_{ijk} \cdot w_k^2$  can be considered as the sum of  $\text{lib}_i \cdot \text{lib}_j$  random variables  
368 with identical distribution given the analytical form of similarity described above. Averaging the  
369 similarities from replicates helps reduce the noise compared to simple aggregation of similarities  
370 from all regions.

371 In the simplified version, matrix is first binarized and TF-IDF transformed like LSI<sup>3</sup> (In  
372 epiConv-simp, normalization with respect to sequencing depth and peak weighting are identical  
373 as LSI). Given TF-IDF matrix  $M$  and  $L$  bootstrap matrices  $M_{\text{rep}_l}$  by randomly sampling peaks from  
374  $M$ , the similarity matrix  $S$  can be calculated as follows:

$$375 \quad S = \frac{\sum_l \log_{10}(M_{\text{rep}_l}^T \cdot M_{\text{rep}_l})}{L}$$

376 Where  $M_{\text{rep}_l}^T \cdot M_{\text{rep}_l}$  is the matrix product. Unlike LSI implemented in Cusanovich et al. 2015<sup>3</sup>  
377 and Cusanovich et al. 2018<sup>7</sup>, we do not filter any peaks. By adopting the formula above, the  
378 distance between two insertions  $\mu_{Ai} - \mu_{Bj}$  is considered as zero if they are in the same peak or  
379 infinite otherwise. Further steps are identical for full and simplified versions.

380 Next, we denoise the similarities between cells by borrowing the information from their  
381 neighbors, which is called similarity blur. Given  $N$  cells and their similarity matrix  $S$  where  $s_{ij}$  is the  
382 similarity between cell  $i$  and  $j$ , we first transform  $S$  to a weight matrix  $W$  as follows:

$$383 \quad w_{ij} = \begin{cases} 10^{s_{ij}} \cdot \log_{10}(\text{lib}_i), & i \in j's \text{ neighbors} \\ 0, & i \notin j's \text{ neighbors} \end{cases}$$

384 Where  $j$ 's neighbors are the top 20 cells with highest similarities to  $j$ . For each column  $j$ , we scale  
385 the sum of column (excluding the diagonal elements) to a fraction parameter  $\theta$  between 0 and 1  
386 and the diagonal elements of  $W$  are set to  $1 - \theta$ . Then the sum of each column is equal to 1. The  
387 matrix  $W$  defines how to mix the information from the cell itself and its neighbors, where  $\theta$   
388 proportion of information comes from its neighbors and the weight of each neighbor is  
389 determined by its similarity to cell  $j$  multiplied by its log10 library size, and  $1 - \theta$  proportion of  
390 information comes from cell  $j$  itself. In this study we set  $\theta$  to 0.25. We create a similarity matrix  $S'$   
391 where its elements are equal to  $S$  except for the diagonal elements (the similarity of each cell to  
392 itself, which is not defined for  $S$ ). The diagonal element  $s'_{jj}$  is set to the 99th percentile of column

393  $j$ , which can be used to approximate the similarity of cell  $j$  to itself. The blurred similarity matrix  
394  $S_{blurred}$  is calculated by matrix product of  $S'$  and  $W$  as follows:

$$395 \quad S_{blurred} = \frac{S' \cdot W + (S' \cdot W)^T}{2}$$

396 Given  $S' \cdot W$  is not a symmetrical matrix, we average  $S' \cdot W$  and  $(S' \cdot W)^T$  to obtain the  
397 similarity matrix. As a proof of the reliability of our algorithm, the upper triangle and lower  
398 triangle of  $S' \cdot W$  are always close to each other. The distance matrix  $D$  is calculated by  $D =$   
399  $-S_{blurred}$ , which can be used for downstream analysis such as dimension reduction and  
400 clustering.

401 **Pre-processing of ATAC-seq data.** We took the processed fragment file or peak by cell matrix as  
402 inputs if available. For the unprocessed data from Buenrostro et al. 2015<sup>6</sup> and bulk samples from  
403 Corces et al. 2016<sup>12</sup>, we aligned raw reads to the hg19 genome using Bowtie2<sup>14</sup> (-X 2000 --no-  
404 mixed --no-discordant) and removed reads with mapping quality <10 and duplicates using Picard  
405 tools. The start and end of the fragments were adjusted (+5 for forward strand and -4 for reverse  
406 strand). We called peaks using MACS2<sup>13</sup> (--nomodel --nolambda --keep-dup all --shift -200 --  
407 extsize 400) and generated the count matrix by counting the number of Tn5 insertions falling in  
408 peaks.

409 For the mouse brain dataset, we randomly sampled 2,000 cells from Channel 1 and Channel  
410 2 in Lareau et al. 2019 (dscATAC-seq)<sup>5</sup>, 1,000 cells from the mouse cortex data from 10x  
411 Genomics and 2,000 cells from two replicates of whole mouse brain in Cusanovich et al. 2018  
412 (sciATAC-seq)<sup>7</sup>. The dataset contains 5,000 cells in total. Data from Cusanovich et al. 2018 were  
413 converted from mm9 to mm10 using liftOver<sup>15</sup>. Data from 10x Genomics and Cusanovich et al.  
414 2018 were re-counted against the peaks called by Lareau et al. 2019 for data integration.

415 For the myoblast dataset, we perform differential analysis on replicate 1 but validate our  
416 results by aggregated samples from both replicate 1 and replicate 2. Few outlier cells in replicate  
417 1 that did not cluster together with the majority of cells were excluded in differential analysis.

418 **Implement of cisTopic and LSI.** In cisTopic, the number of topics is set to 20, 30, 40 and 50 and  
419 automatically decided by cisTopic. For the analysis of cell lines data from Buenrostro et al. 2015<sup>6</sup>,  
420 in order to explore whether increased number of topics could provide higher resolution for K562  
421 cells, we increase the number of topics from 20 to 100 with a step of 10 but the optimal number

422 of topics is still decided by cisTopic. The imputation from cisTopic is obtained using the function  
423 `predictiveDistribution()`. In LSI, we use the scripts from Cusanovich et al. 2018<sup>7</sup>, filter out peaks  
424 with frequency < 0.01 and use the top 50 components of singular value decomposition for  
425 dimension reduction.

426 **Differential analysis algorithm.** The input data is a binarized peak by cell matrix and a distance  
427 matrix between cells. Here we use the peak by cell matrix from previous steps. For each single  
428 cell, we define  $k$  cells with highest similarities as its neighbors (including itself). Then for each  
429 peak, we test whether it is more likely to be accessible in the cell's neighbors. This problem can  
430 be resolved using hypergeometric test, with cells accessible as black balls, cells inaccessible as  
431 white balls. The sampling times ( $\hat{k}$ , the adjusted number of neighbors) is calculated by the total  
432 scaling factor of all neighbors divided by the average scaling factors of all cells. By such definition,  
433  $\hat{k}$  remains constant ( $\hat{k} = k$ ) in cell-norm strategy while the total library size of  $\hat{k}$  neighbors  
434 (average library size multiplied by  $\hat{k}$ ) remains constant in lib-norm strategy. The z-scores are  
435 calculated by the number of cells accessible among neighbors and z-normalized by corresponding  
436 mean and variance of the null distribution.

437 In differential analyses in this study, the number of neighbors  $k$  is set to 5% of total cells. The  
438 number of neighbors  $k$  defines the size of potential clusters, which serves similar function as the  
439 number of clusters in conventional pipeline. However, the results demonstrated that our  
440 algorithm with fixed  $k$  could still detect DE peaks in clusters with a wide range of size. Here,  $k$  is  
441 set to 5% in order to make our algorithm more sensitive to DE peaks of small clusters. After  
442 obtaining the z-scores, we select peaks with z-score > 2 in at least 10% cells as DE peaks. For all  
443 cells from replicate 1 of CD34 dataset, we select peaks with z-score > 2 in at least 30% cells as we  
444 only want to detect DE peaks between major clusters and the criterion of 10% cells suggested  
445 most peaks to be differentially accessible, which was reasonable but not desired. All DE peaks are  
446 selected by z-scores from cell-norm strategy except for the CD34+ cells. As the results from two  
447 normalization strategies differs from each other for the CD34+ cells, we selected DE peaks based  
448 on z-scores from cell-norm and lib-norm strategies, respectively.

449 In fact, it is not straightforward to choose a proper threshold for z-score. We find that peaks  
450 that do not satisfy the threshold described above may also show weak DE pattern. Here, we use  
451 the threshold of 10% cells with z-score >2 because selected peaks can be easily validated by bulk

452 samples. For general purpose, users can set the threshold manually to obtain appropriate  
453 number of DE peaks.  
454 **Dimension reduction.** We perform dimension reduction of single cells using the uniform  
455 manifold projection (UMAP) algorithm<sup>16</sup> by feeding umap with the distance matrix learned by  
456 epiConv, cisTopic and LSI using default settings. The number of reduced components was set to 1  
457 for heatmaps and 2 for scatterplot of cells. We also embed DE peaks into 1D space by feeding  
458 umap with the distance matrix that is calculated by one minus spearman correlation of z-scores  
459 between peaks.

460 **Density clustering.** We use the density clustering algorithm<sup>11</sup> in R package densityClust to cluster  
461 single cells for CD34+ single cells. The thresholds of  $\rho$  and  $\delta$  are manually adjusted to match the  
462 annotations from Satpathy et al. 2019<sup>5</sup>. As differential analysis does not rely on the results of  
463 clustering, the thresholds of  $\rho$  and  $\delta$  won't affect downstream analyses.

464 **Bulk sample processing.** For bulk samples of hematopoietic cells from Corces et al. 2016<sup>12</sup>, we  
465 count the Tn5 insertions against the peaks called from Satpathy et al. 2019<sup>5</sup>, normalize the counts  
466 by library size and average the normalized counts across all replicates for each cell type. For the  
467 myoblast dataset, we de-multiplex the reads, count the Tn5 insertions and normalize the counts  
468 by harvesting times.

469 **Data availability.** The cell lines data of Buenrostro et al. 2015<sup>6</sup> is obtained from Gene Expression  
470 Omnibus (GEO) accession GSE65360. The data of Satpathy et al. 2019<sup>4</sup> is obtained from GEO  
471 accession GSE129785. The data of Lareau et al. 2019<sup>5</sup> is obtained from GEO accession  
472 GSE123581. The data of Cusanovich et al. 2018<sup>7</sup> is obtained from Mouse Cell Atlas  
473 (<http://atlas.gs.washington.edu/mouse-atac/>). The data of adult mouse cortex is obtained from  
474 10X Genomics website ([https://support.10xgenomics.com/single-cell-  
475 atac/datasets/1.2.0/atac\\_v1\\_adult\\_brain\\_fresh\\_5k](https://support.10xgenomics.com/single-cell-atac/datasets/1.2.0/atac_v1_adult_brain_fresh_5k)). Myoblasts data<sup>8</sup> is obtained from GEO  
476 accession GSE109828. EpiConv is available at Github (<https://github.com/LiLin-biosoft/epiConv>).

477

## 478 **Acknowledgements**

479 This project was funded by the National Key Research and Development Program of China  
480 (2018YFC1004602), National Natural Science Foundation of China (NSF 31871332) and a startup  
481 fund to L.Z. from ShanghaiTech University. We would like to thank Xiaojing Zhao for testing the

482 scripts. We would like to thank Yingdong Zhang on his technical support on the HPC platform of  
483 ShanghaiTech University.

484

485 **Author contributions**

486 L.L. conceived the study, developed the methods and performed analyses. L.L. and L.Z. wrote the  
487 manuscript.

488 **Competing interests**

489 The authors declare no competing interests.

490

## 491 Reference:

- 492 1. Buenrostro, J.D., Giresi, P.G., Zaba, L.C., Chang, H.Y. & Greenleaf, W.J. Transposition of native  
493 chromatin for fast and sensitive epigenomic profiling of open chromatin, DNA-binding  
494 proteins and nucleosome position. *Nat Methods* **10**, 1213-1218 (2013).
- 495 2. Klemm, S.L., Shipony, Z. & Greenleaf, W.J. Chromatin accessibility and the regulatory  
496 epigenome. *Nat Rev Genet* **20**, 207-220 (2019).
- 497 3. Cusanovich, D.A. et al. Multiplex single cell profiling of chromatin accessibility by  
498 combinatorial cellular indexing. *Science* **348**, 910-914 (2015).
- 499 4. Satpathy, A.T. et al. Massively parallel single-cell chromatin landscapes of human immune cell  
500 development and intratumoral T cell exhaustion. *Nat Biotechnol* **37**, 925-936 (2019).
- 501 5. Lareau, C.A. et al. Droplet-based combinatorial indexing for massive-scale single-cell  
502 chromatin accessibility. *Nat Biotechnol* **37**, 916-924 (2019).
- 503 6. Buenrostro, J.D. et al. Single-cell chromatin accessibility reveals principles of regulatory  
504 variation. *Nature* **523**, 486-490 (2015).
- 505 7. Cusanovich, D.A. et al. A Single-Cell Atlas of In Vivo Mammalian Chromatin Accessibility. *Cell*  
506 **174**, 1309-1324 e1318 (2018).
- 507 8. Pliner, H.A. et al. Cicero Predicts cis-Regulatory DNA Interactions from Single-Cell Chromatin  
508 Accessibility Data. *Mol Cell* **71**, 858-871 e858 (2018).
- 509 9. Schep, A.N., Wu, B., Buenrostro, J.D. & Greenleaf, W.J. chromVAR: inferring transcription-  
510 factor-associated accessibility from single-cell epigenomic data. *Nat Methods* **14**, 975-978  
511 (2017).
- 512 10. Bravo Gonzalez-Blas, C. et al. cisTopic: cis-regulatory topic modeling on single-cell ATAC-seq  
513 data. *Nat Methods* **16**, 397-400 (2019).
- 514 11. Rodriguez, A. & Laio, A. Machine learning. Clustering by fast search and find of density peaks.  
515 *Science* **344**, 1492-1496 (2014).
- 516 12. Corces, M.R. et al. Lineage-specific and single-cell chromatin accessibility charts human  
517 hematopoiesis and leukemia evolution. *Nat Genet* **48**, 1193-1203 (2016).
- 518 13. Zhang, Y. et al. Model-based analysis of ChIP-Seq (MACS). *Genome Biol* **9**, R137 (2008).
- 519 14. Langmead, B. & Salzberg, S.L. Fast gapped-read alignment with Bowtie 2. *Nat Methods* **9**,

- 520 357-359 (2012).
- 521 15. Kent, W.J. et al. The human genome browser at UCSC. *Genome Res* **12**, 996-1006 (2002).
- 522 16. McInnes, L., Healy, J., Saul, N. & Großberger, L. UMAP: Uniform Manifold Approximation and
- 523 Projection. *Journal of Open Source Software* **3** (2018).
- 524

525 **Supplementary materials**

526



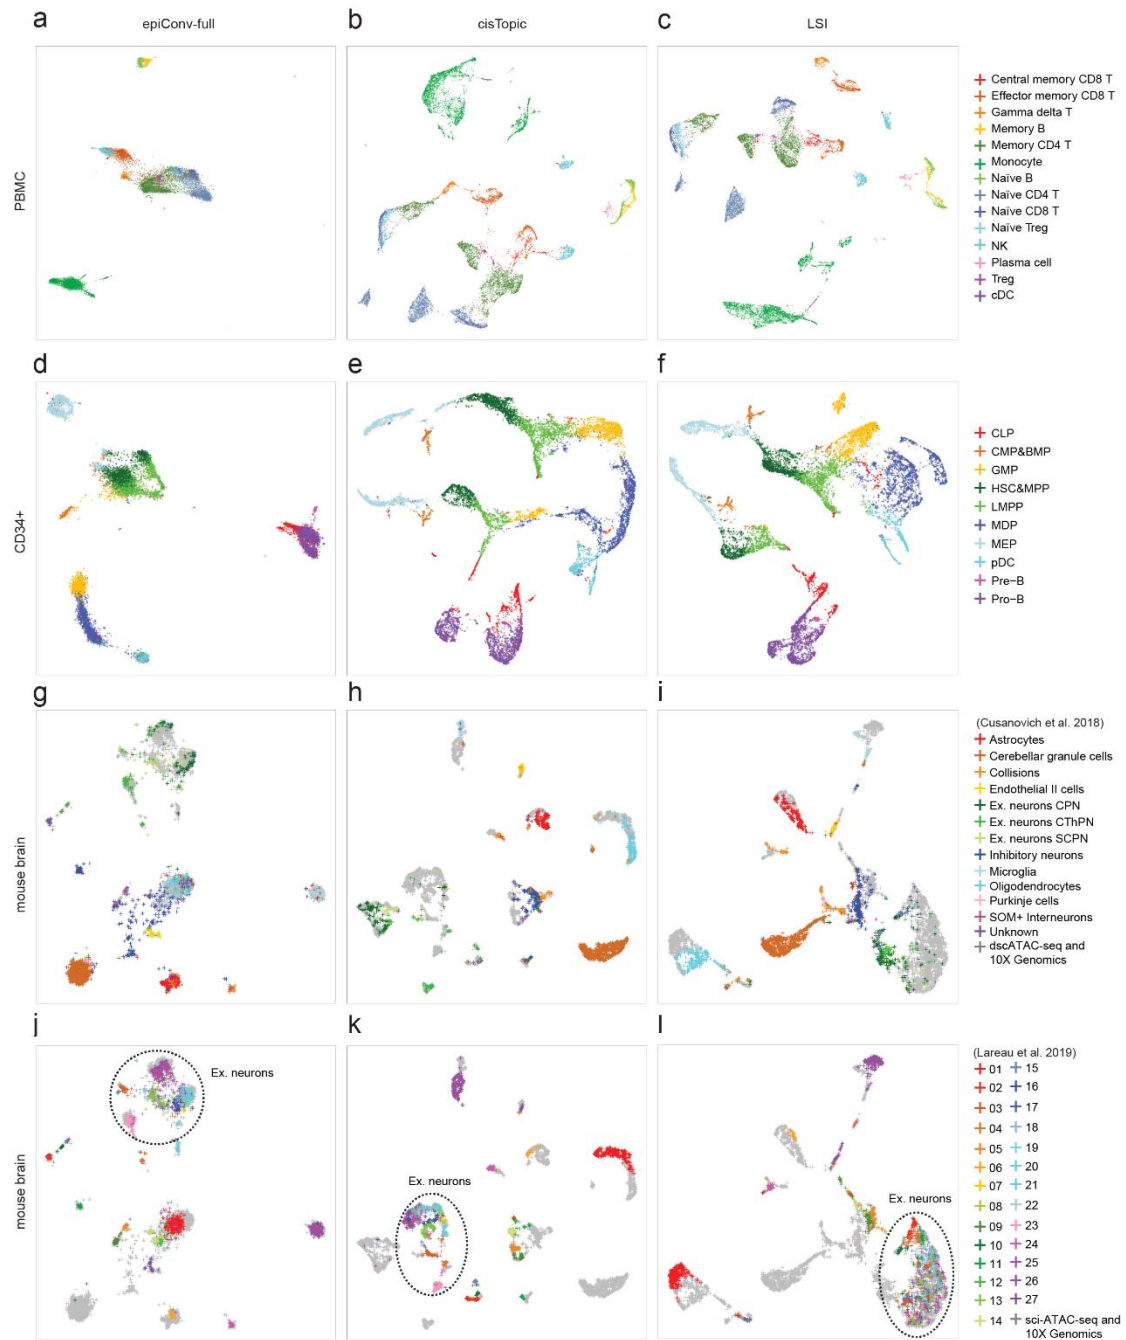

527

528 **Figure S1.** Comparisons of embedding by epiConv, cisTopic and LSI with cell annotations from  
 529 original articles. (a-c) Embedding by epiConv-full, cisTopic and LSI for PBMC dataset, annotated by  
 530 Satpathy et al. 2019. (d-f) Embedding by epiConv-full, cisTopic and LSI for CD34+ dataset,  
 531 annotated by Satpathy et al. 2019. (g-l) Embedding by epiConv-full, cisTopic and LSI for the  
 532 integration of mouse brain data from dscATAC-seq, 10x Genomics and sci-ATAC-seq, annotated by  
 533 Cusanovich et al. 2018 (g-i) and Lareau et al. 2019 (j-l).

534

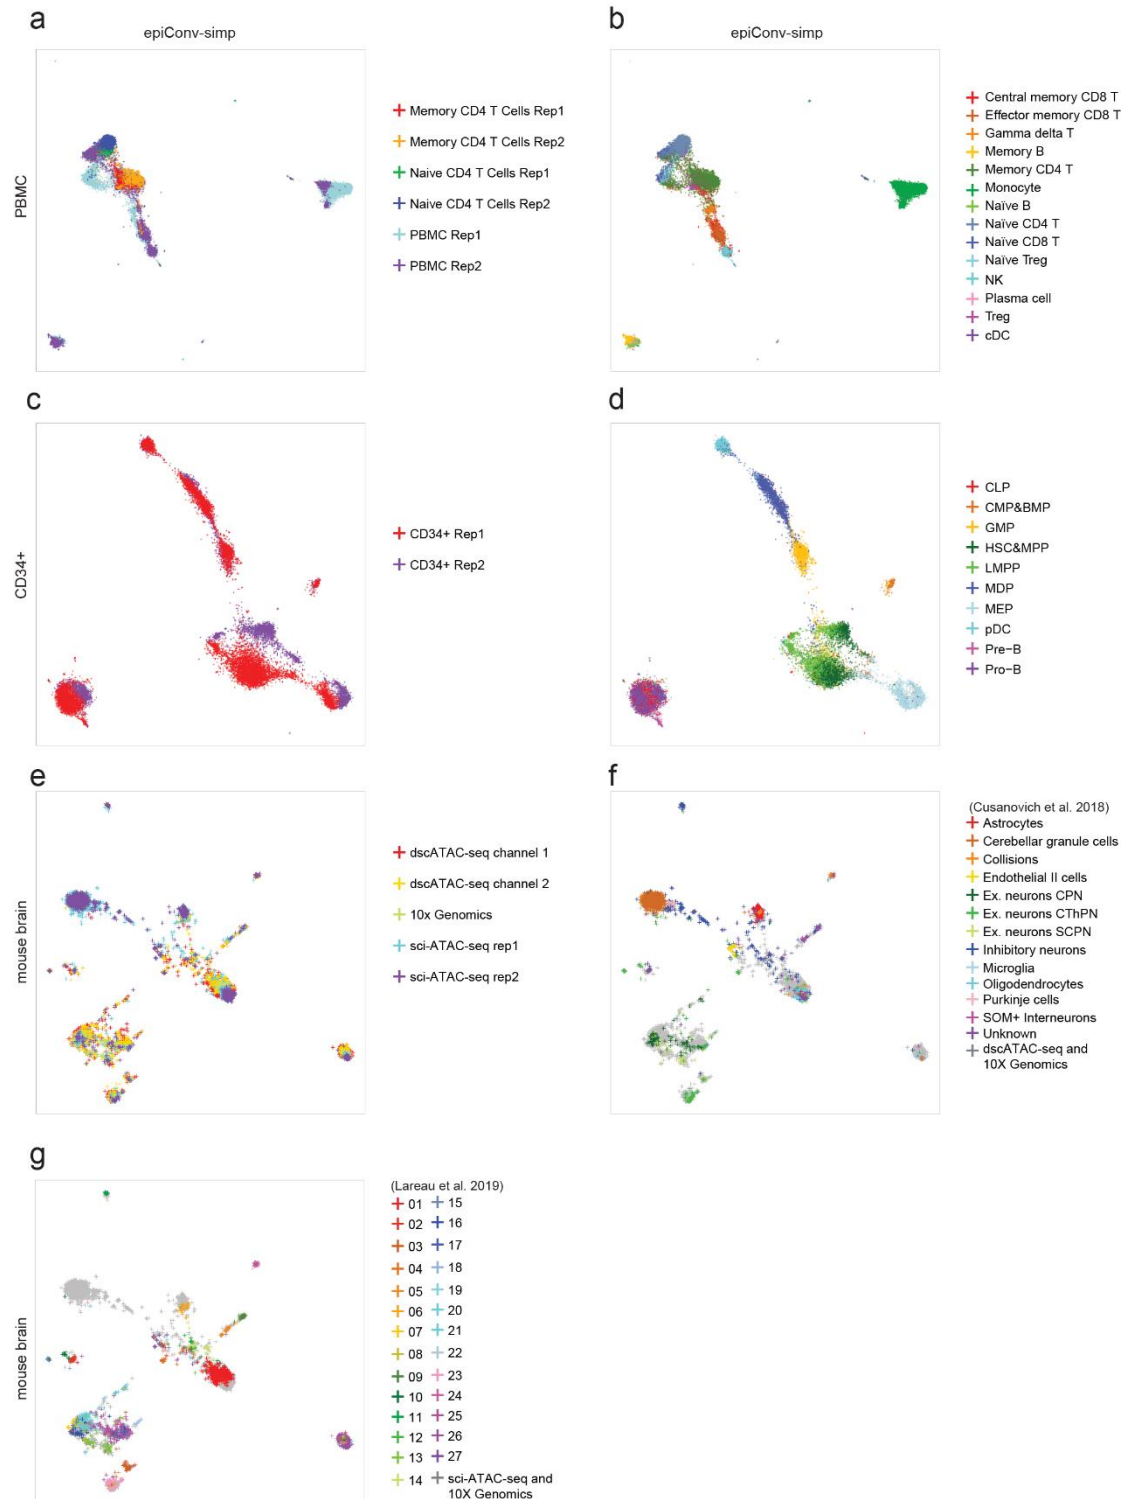

535

536 **Figure S2.** Embeddings of PBMC, CD34+ and mouse brain datasets by epiConv-simp. **(a,b)**

537 Embedding by epiConv-simp for PBMC dataset, colored by batch **(a)** and annotations from

538 Satpathy et al. 2019 **(b)**. **(c,d)** Embedding by epiConv-simp for CD34+ dataset, colored by batch **(c)**

539 and annotations from Satpathy et al. 2019 **(d)**. **(e-g)** Embedding by epiConv-simp for mouse brain

540 dataset, colored by batch **(e)**, annotations from Cusanovich et al. 2018 **(f)** and annotations from  
541 Lareau et al. 2019 **(g)**.  
542

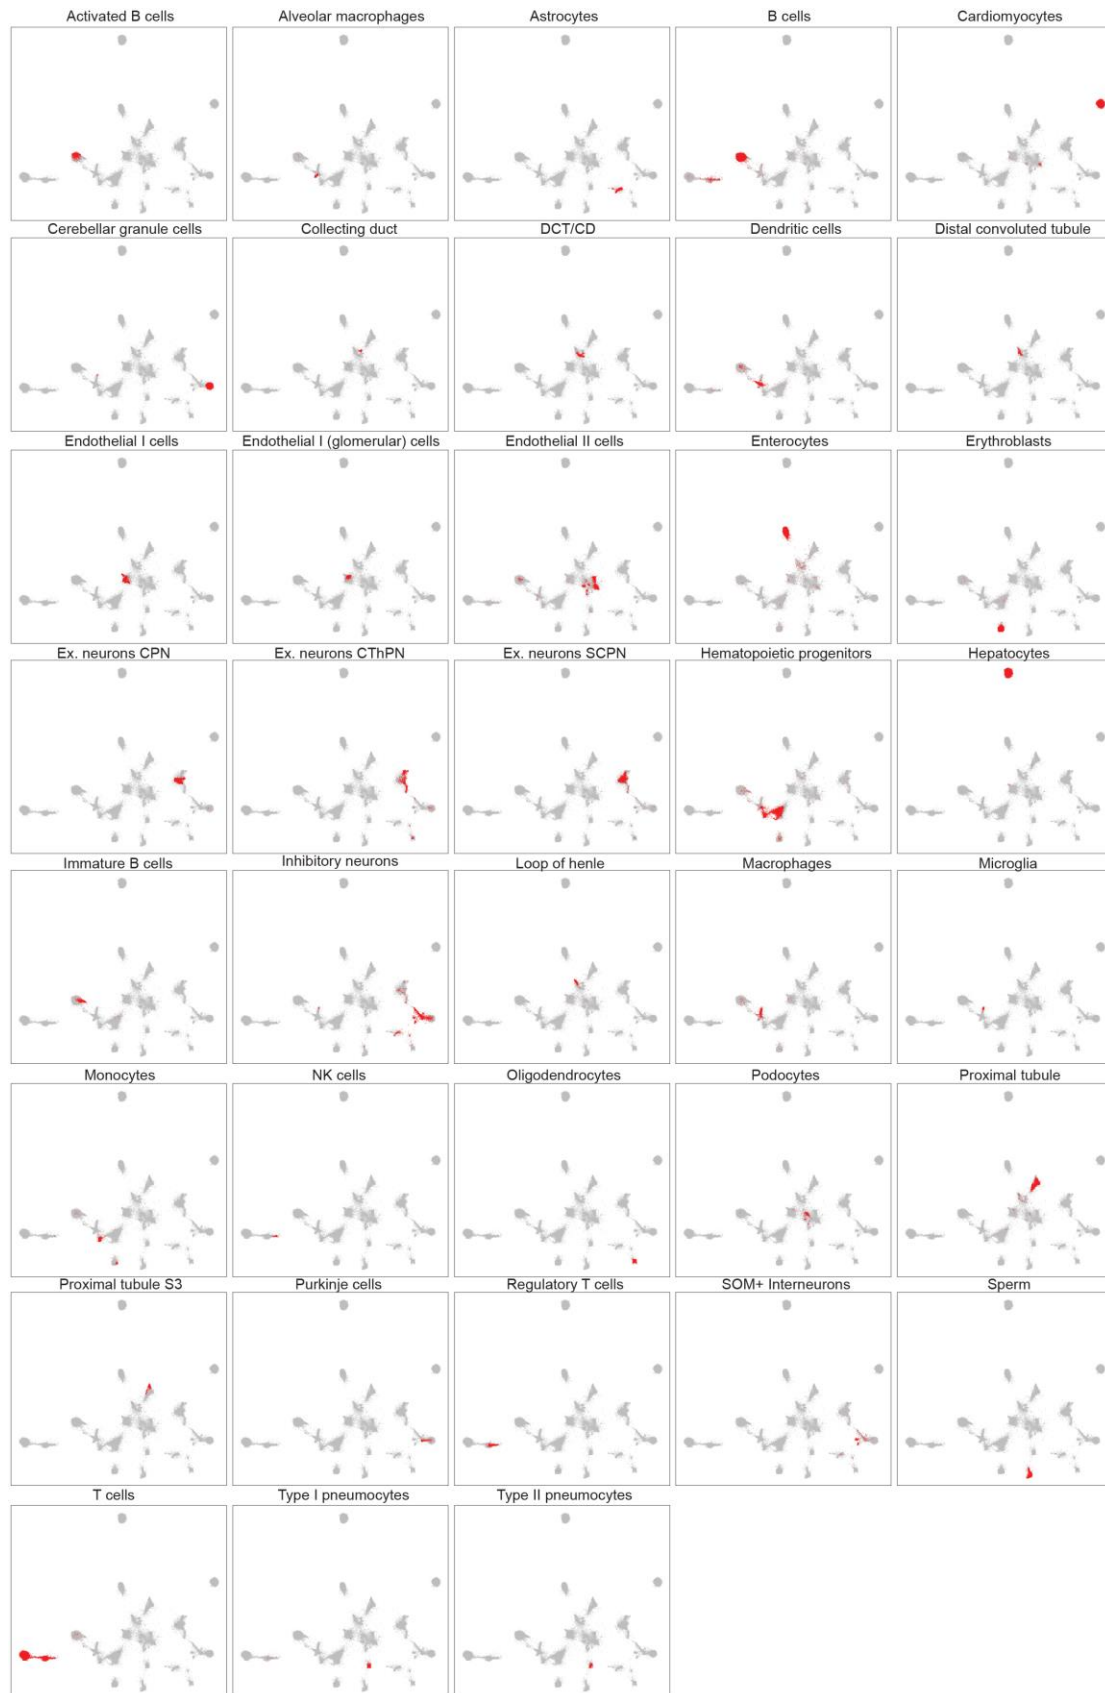

543

544 **Figure S3.** Embedding of Mouse Cell Atlas dataset by epiConv-simp. The corresponding cell types

545 are colored in red and other cells are colored in grey.

546

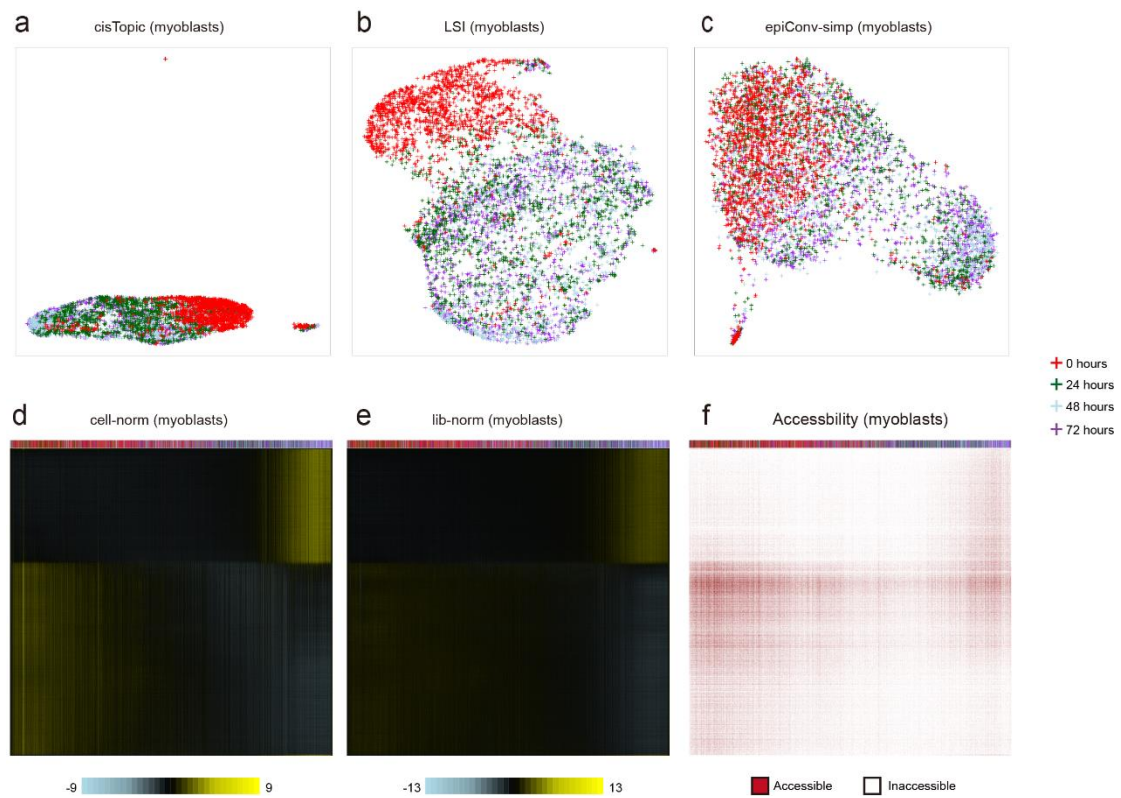

547

548 **Figure S4.** Embedding of myoblasts by different methods and results of differential analysis. **(a)**

549 Embedding by cisTopic. **(b)** Embedding by LSI. **(c)** Embedding by epiConv-simp. **(d)** Accessibility z-

550 scores by cell-norm strategy, identical as **Fig. 4b**. **(e)** Accessibility z-scores by lib-norm strategy. **(f)**

551 Binary accessibility profiles.

552

553

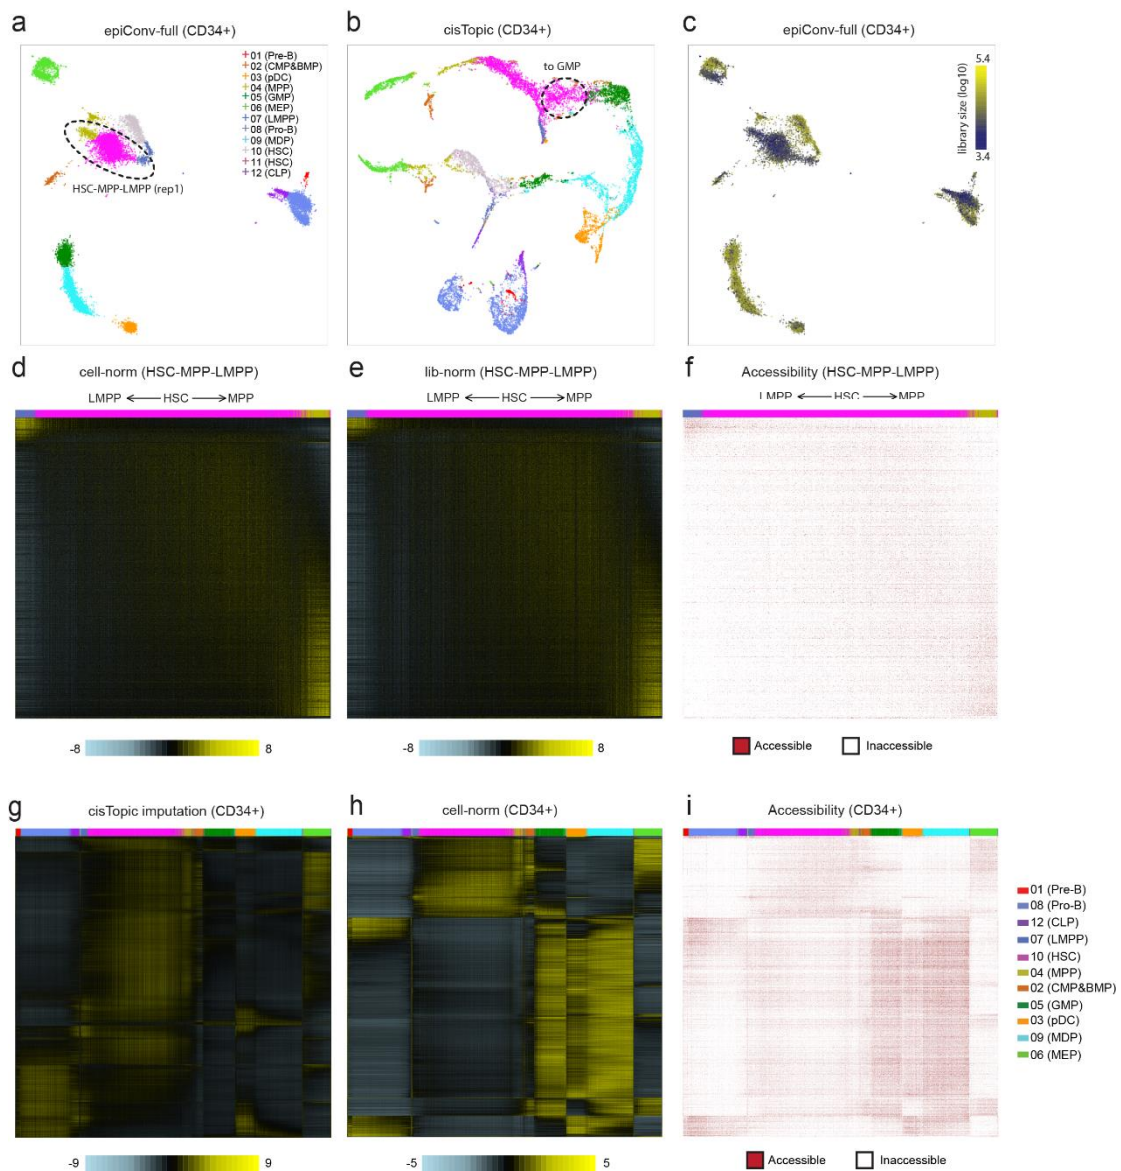

554

555 **Figure S5.** Density clustering of CD34+ single cells and results of differential analysis. (a)

556 Embedding by epiConv-full. Cells are colored by the results of density clustering. HSC-MPP-LMPP

557 cluster examined in differential analysis is circled. (b) Embedding by cisTopic. Cells are colored

558 according to (a). Cells under the differentiation to GMP that are marked in **Fig. 5e** are circled. (c)

559 Embedding by epiConv-full, colored by library size. (d) Accessibility z-scores by cell-norm strategy

560 for HSC-MPP-LMPP cluster, identical as **Fig. 4d**. (e) Accessibility z-scores by lib-norm strategy for

561 HSC-MPP-LMPP cluster. (f) Binary accessibility profiles for HSC-MPP-LMPP cluster. (g) Accessibility

562 imputations of HSC-MPP-LMPP single cells inferred by cisTopic, identical as **Fig. 5e** but cells (x-

563 axis) are ordered according to 1D embedding by epiConv. (h) Accessibility z-scores by cell-norm

564 strategy for CD34+ single cells. (i) Binary accessibility profiles for CD34+ single cells. Peaks (y-axis)

565 in (h,i) are NOT the same as **Fig. 5g-i** and are selected by cell-norm strategy, independently.

566
